# Supplementary material for: Effect of Different Soil Treatments on Production and Chemical Composition of Essential Oils Extracted from Foeniculum vulgare Mill., Origanum vulgare L. and Thymus vulgaris L
Source: MDPI journal article supplement (doi:10.3390/plants12152835), 2023-07-31
Supplement: s1 [file s1]

## Supplementary Material

# Effect of Different Soil Treatments on Production and Chemical Composition of Essential Oils Extracted from *Foeniculum vulgare* Mill., *Origanum vulgare* L. and *Thymus vulgaris* L.

Antonio Raffo <sup>1,‡</sup>, Filippo Umberto Sapienza <sup>2,‡</sup>, Roberta Astolfi <sup>2</sup>, Gabriele Lombardi <sup>3</sup>, Caterina Frascchetti <sup>4</sup>, Mijat Božović <sup>5</sup>, Marco Artini <sup>6</sup>, Rosanna Papa <sup>6</sup>, Marika Trecca <sup>6</sup>, Simona Fiorentino <sup>7</sup>, Valerio Vecchiarelli <sup>7</sup>, Claudia Papalini <sup>8</sup>, Laura Selan <sup>6</sup> and Rino Ragno <sup>2,\*</sup>

<sup>1</sup> CREA-Research Centre for Food and Nutrition, Via Ardeatina, 546, 00178 Rome, Italy; [antonio.raffo@crea.gov.it](mailto:antonio.raffo@crea.gov.it)

<sup>2</sup> Rome Center for Molecular Design, Department of Drug Chemistry and Technology, Sapienza University, p.le Aldo Moro 5, 00185 Rome, Italy; [filippo.sapienza@uniroma1.it](mailto:filippo.sapienza@uniroma1.it); [astolfi.1766291@studenti.uniroma1.it](mailto:astolfi.1766291@studenti.uniroma1.it)

<sup>3</sup> Department of Environmental Biology, Sapienza University, p.le Aldo Moro 5, 00185 Rome, Italy; [gabriele.lombardi@uniroma1.it](mailto:gabriele.lombardi@uniroma1.it)

<sup>4</sup> Department of Drug Chemistry and Technology, Sapienza University, p.le Aldo Moro 5, 00185 Rome, Italy; [caterina.frascchetti@uniroma1.it](mailto:caterina.frascchetti@uniroma1.it)

<sup>5</sup> Faculty of Natural Science and Mathematics, University of Montenegro, Džordža Vašingtona bb, 81000 Podgorica, Montenegro; [mijatboz@ucg.ac.me](mailto:mijatboz@ucg.ac.me)

<sup>6</sup> Department of Public Health and Infectious Diseases, Sapienza University, p.le Aldo Moro 5, 00185 Rome, Italy; [marco.artini@uniroma1.it](mailto:marco.artini@uniroma1.it); [rosanna.papa@uniroma1.it](mailto:rosanna.papa@uniroma1.it); [trecca.1820515@studenti.uniroma1.it](mailto:trecca.1820515@studenti.uniroma1.it); [laura.selan@uniroma1.it](mailto:laura.selan@uniroma1.it)

<sup>7</sup> Centro Appenninico del Terminillo “Carlo Jucci”. Perugia University. Via Comunali, 43 – 02100 Rieti, Italy; [simona.fiorentino@unipg.it](mailto:simona.fiorentino@unipg.it); [valerio.vecchiarelli@unipg.it](mailto:valerio.vecchiarelli@unipg.it)

<sup>8</sup> ARSIAL Agenzia Regionale per lo Sviluppo e l'Innovazione dell'Agricoltura del Lazio, Rome, Italy; [c.papalini@arsial.it](mailto:c.papalini@arsial.it)

\* Correspondence: [rino.ragno@uniroma1.it](mailto:rino.ragno@uniroma1.it); Tel.: +39-6-4991-3937; fax: +39-6-4991-3627.

‡ These authors contributed equally to this work.

**Table S1.** List of quantified constituents of FV essential oils. Retention indexes and method of identification used.

| Nr | Compound name                   | Retention index experimental | Retention index, literature <sup>1</sup> | Method of identification <sup>2</sup> |
|----|---------------------------------|------------------------------|------------------------------------------|---------------------------------------|
| 1  | $\alpha$ -pinene                | 933                          | 924-951                                  | RI, MS, PC                            |
| 2  | sabinene                        | 968                          | 958-981                                  | RI, MS                                |
| 3  | $\beta$ -pinene                 | 974                          | 962-987                                  | RI, MS, PC                            |
| 4  | $\beta$ -myrcene                | 982                          | 975-991                                  | RI, MS, PC                            |
| 5  | $\alpha$ -phellandrene          | 1000                         | 990-1009                                 | RI, MS, PC                            |
| 6  | 3-carene                        | 1008                         | 997-1027                                 | RI, MS                                |
| 7  | <i>p</i> -cymene                | 1014                         | 1004-1029                                | RI, MS, PC                            |
| 8  | limonene                        | 1023                         | 1012-1038                                | RI, MS, PC                            |
| 9  | $\gamma$ -terpinene             | 1050                         | 1035-1062                                | RI, MS, PC                            |
| 10 | fenchone                        | 1071                         | 1059-1087                                | RI, MS                                |
| 11 | linalool                        | 1084                         | 1074-1098                                | RI, MS, PC                            |
| 12 | fenchyl alcohol                 | 1105                         | 1088-1122                                | RI, MS                                |
| 13 | cis- <i>p</i> -menth-2,8-dienol | 1118                         | 1100-1127                                | RI, MS                                |
| 14 | camphor                         | 1124                         | 1106-1153                                | RI, MS, PC                            |
| 15 | 4-terpineol                     | 1165                         | 1148-1180                                | RI, MS, PC                            |

|    |                          |      |           |            |
|----|--------------------------|------|-----------|------------|
| 16 | estragole                | 1176 | 1169-1190 | RI, MS, PC |
| 17 | verbenone                | 1185 | 1167-1198 | RI, MS, PC |
| 18 | fenchylacetate, endo     | 1209 | 1205-1215 | RI, MS     |
| 19 | p-anisaldehyde           | 1215 | 1206-1240 | RI, MS     |
| 20 | fenchylacetate, exo      | 1224 | 1214-1232 | RI, MS     |
| 21 | anethole                 | 1261 | 1253-1284 | RI, MS, PC |
| 22 | isobornyl acetate        | 1272 | 1259-1282 | RI, MS     |
| 23 | carvacrol                | 1282 | 1272-1300 | RI, MS, PC |
| 24 | 2,3-dimethylhydroquinone | 1333 | n.a.      | MS         |
| 25 | anisyl methyl ketone     | 1343 | n.a.      | MS         |
| 26 | $\beta$ -caryophyllene   | 1423 | 1400-1442 | RI, MS, PC |
| 27 | 4-methoxycinnamaldehyde  | 1520 | 1505-1536 | RI, MS     |
| 28 | caryophyllene oxide      | 1576 | 1549-1587 | RI, MS     |

Notes: <sup>1</sup> Reported range are the 90% confidence interval estimates of retention indexes, based on the number of available data records, determined on dimethylsilicone stationary phase, as reported by Babushok et al., 2011.

<sup>2</sup> Identification of compound based on: RI (literature retention index), MS (library mass spectrum), PS (retention index and mass spectrum of pure standard compound).

**Table S2.** List of quantified constituents of OV essential oils. Retention indexes and method of identification used.

| Nr | Compound name                 | Retention index experimental | Retention index, literature <sup>1</sup> | Method of identification <sup>2</sup> |
|----|-------------------------------|------------------------------|------------------------------------------|---------------------------------------|
| 1  | $\alpha$ -thujene             | 925                          | 916-938                                  | RI, MS                                |
| 2  | $\alpha$ -pinene              | 933                          | 924-951                                  | RI, MS, PC                            |
| 3  | $\beta$ -thujene              | 937                          | n.a.                                     | MS                                    |
| 4  | camphene                      | 947                          | 936-965                                  | RI, MS                                |
| 5  | 1-octen-3-ol                  | 961                          | 958-980                                  | RI, MS, PC                            |
| 6  | 3-octanone                    | 964                          | 961-971                                  | RI, MS, PC                            |
| 7  | sabinene                      | 968                          | 958-981                                  | RI, MS                                |
| 8  | $\beta$ -pinene               | 974                          | 962-987                                  | RI, MS, PC                            |
| 9  | 3-octanol                     | 978                          | 974-995                                  | RI, MS                                |
| 10 | $\beta$ -myrcene              | 982                          | 975-991                                  | RI, MS, PC                            |
| 11 | $\alpha$ -terpinene           | 1011                         | 1001-1024                                | RI, MS, PC                            |
| 12 | <i>p</i> -cymene              | 1014                         | 1004-1029                                | RI, MS, PC                            |
| 13 | limonene<br>+ 1,8-cineole     | 1023                         | 1012-1038<br>1013-1039                   | RI, MS, PC<br>RI, MS, PC              |
| 14 | <i>cis</i> - $\beta$ -ocimene | 1026                         | 1017-1040                                | RI, MS                                |
| 15 | $\gamma$ -terpinene           | 1050                         | 1035-1062                                | RI, MS, PC                            |
| 16 | <i>cis</i> -sabinene hydrate  | 1055                         | 1044-1066                                | RI, MS                                |
| 17 | terpinolene                   | 1081                         | 1064-1091                                | RI, MS, PC                            |
| 18 | linalool                      | 1084                         | 1074-1098                                | RI, MS, PC                            |
| 19 | camphor                       | 1124                         | 1106-1153                                | RI, MS, PC                            |
| 20 | borneol                       | 1152                         | 1134-1172                                | RI, MS, PC                            |
| 21 | 4-terpineol                   | 1165                         | 1148-1180                                | RI, MS, PC                            |
| 22 | estragole                     | 1176                         | 1169-1190                                | RI, MS, PC                            |
| 23 | dihydrocarvone                | 1180                         | 1162-1206                                | RI, MS                                |
| 24 | thymol methyl ether           | 1215                         | 1199-1235                                | RI, MS                                |
| 25 | carvacrol methyl ether        | 1225                         | 1205-1230                                | RI, MS                                |
| 26 | <i>cis</i> -geraniol          | 1236                         | 1231-1256                                | RI, MS                                |
| 27 | anethole                      | 1261                         | 1253-1284                                | RI, MS                                |
| 28 | thymol                        | 1267                         | 1260-1289                                | RI, MS, PC                            |
| 29 | carvacrol                     | 1282                         | 1272-1300                                | RI, MS, PC                            |
| 30 | thymol acetate                | 1326                         | 1330-1351                                | RI, MS                                |
| 31 | $\alpha$ -bourbonene          | 1388                         | 1383-1409                                | RI, MS                                |
| 32 | $\beta$ -caryophyllene        | 1423                         | 1400-1442                                | RI, MS, PC                            |
| 33 | $\alpha$ -humulene            | 1456                         | 1430-1466                                | RI, MS, PC                            |
| 34 | $\gamma$ -muurolene           | 1474                         | 1455-1494                                | RI, MS                                |
| 35 | germacrene D                  | 1481                         | 1458-1491                                | RI, MS                                |
| 36 | bicyclogermacrene             | 1496                         | 1474-1501                                | RI, MS                                |
| 37 | $\beta$ -bisabolene           | 1503                         | 1485-1511                                | RI, MS                                |
| 38 | $\gamma$ -cadinene            | 1511                         | 1490-1521                                | RI, MS                                |
| 39 | calamenene                    | 1514                         | 1505-1524                                | RI, MS                                |
| 40 | $\delta$ -cadinene            | 1518                         | 1498-1526                                | RI, MS                                |

|    |                     |      |           |        |
|----|---------------------|------|-----------|--------|
| 41 | spathulenol         | 1569 | 1549-1580 | RI, MS |
| 42 | caryophyllene oxide | 1576 | 1549-1587 | RI, MS |

Notes: <sup>1</sup> Reported range are the 90% confidence interval estimates of retention indexes, based on the number of available data records, determined on dimethylsilicone stationary phase, as reported by Babushok et al., 2011.

<sup>2</sup> Identification of compound based on: RI (literature retention index), MS (library mass spectrum), PS (retention index and mass spectrum of pure standard compound).

**Table S3.** List of quantified constituents of TV essential oils. Retention indexes and method of identification used.

| Nr | Compound name                | Retention index experimental | Retention index, literature <sup>1</sup> | Method of identification <sup>2</sup> |
|----|------------------------------|------------------------------|------------------------------------------|---------------------------------------|
| 1  | methyl-2-methyl butanoate    | 757                          | 755-768                                  | RI, MS                                |
| 2  | $\alpha$ -thujene            | 925                          | 916-938                                  | RI, MS                                |
| 3  | $\alpha$ -pinene             | 933                          | 924-951                                  | RI, MS, PC                            |
| 4  | camphene                     | 947                          | 936-965                                  | RI, MS                                |
| 5  | 1,4-pentenylpropionate       | 956                          | 956-990                                  | RI, MS                                |
| 6  | 1-octen-3-ol                 | 961                          | 958-980                                  | RI, MS, PC                            |
| 7  | 3-octanone                   | 964                          | 961-971                                  | RI, MS, PC                            |
| 8  | $\beta$ -pinene              | 974                          | 962-987                                  | RI, MS, PC                            |
| 9  | 3-octanol                    | 978                          | 974-995                                  | RI, MS                                |
| 10 | $\beta$ -myrcene             | 982                          | 975-991                                  | RI, MS, PC                            |
| 11 | $\alpha$ -phellandrene       | 1000                         | 990-1009                                 | RI, MS, PC                            |
| 12 | 3-carene                     | 1008                         | 997-1027                                 | RI, MS                                |
| 13 | $\alpha$ -terpinene          | 1011                         | 1001-1024                                | RI, MS, PC                            |
| 14 | <i>p</i> -cymene             | 1014                         | 1004-1029                                | RI, MS, PC                            |
| 15 | 1,8-cineole                  | 1023                         | 1013-1039                                | RI, MS, PC                            |
| 16 | $\gamma$ -terpinene          | 1050                         | 1035-1062                                | RI, MS, PC                            |
| 17 | <i>cis</i> -sabinene hydrate | 1055                         | 1044-1066                                | RI, MS                                |
| 18 | fenchone                     | 1071                         | 1059-1087                                | RI, MS                                |
| 19 | linalool                     | 1084                         | 1074-1098                                | RI, MS, PC                            |
| 20 | camphor                      | 1124                         | 1106-1153                                | RI, MS, PC                            |
| 21 | borneol                      | 1152                         | 1134-1172                                | RI, MS, PC                            |
| 22 | 4-terpineol                  | 1165                         | 1148-1180                                | RI, MS, PC                            |
| 23 | $\alpha$ -terpineol          | 1174                         | 1159-1191                                | RI, MS, PC                            |
| 24 | estragole                    | 1176                         | 1169-1190                                | RI, MS, PC                            |
| 25 | thymol methyl ether          | 1215                         | 1199-1235                                | RI, MS                                |
| 26 | carvacrol methyl ether       | 1225                         | 1205-1230                                | RI, MS                                |
| 27 | <i>cis</i> -geraniol         | 1236                         | 1231-1256                                | RI, MS                                |
| 28 | geranial                     | 1246                         | 1236-1260                                | RI, MS                                |
| 29 | anethole                     | 1261                         | 1253-1284                                | RI, MS                                |
| 30 | thymol                       | 1267                         | 1260-1289                                | RI, MS, PC                            |
| 31 | carvacrol                    | 1282                         | 1272-1300                                | RI, MS, PC                            |
| 32 | thymol acetate               | 1326                         | 1330-1351                                | RI, MS                                |
| 33 | $\alpha$ -copaene            | 1380                         | 1360-1392                                | RI, MS                                |
| 34 | $\beta$ -bourbonene          | 1388                         | 1383-1409                                | RI, MS                                |
| 35 | $\beta$ -caryophyllene       | 1423                         | 1400-1442                                | RI, MS, PC                            |
| 36 | $\beta$ -farnesene           | 1448                         | 1438-1466                                | RI, MS                                |
| 37 | $\alpha$ -humulene           | 1456                         | 1430-1466                                | RI, MS, PC                            |
| 38 | $\gamma$ -muurolene          | 1474                         | 1455-1494                                | RI, MS                                |
| 39 | bicyclogermacrene            | 1496                         | 1474-1501                                | RI, MS                                |

|    |                     |      |           |        |
|----|---------------------|------|-----------|--------|
| 40 | $\beta$ -bisabolene | 1503 | 1485-1511 | RI, MS |
| 41 | $\gamma$ -cadinene  | 1511 | 1490-1521 | RI, MS |
| 42 | calamenene          | 1514 | 1505-1524 | RI, MS |
| 43 | $\delta$ -cadinene  | 1518 | 1498-1526 | RI, MS |
| 44 | caryophyllene oxide | 1576 | 1549-1587 | RI, MS |

Notes: <sup>1</sup> Reported range are the 90% confidence interval estimates of retention indexes, based on the number of available data records, determined on dimethylsilicone stationary phase, as reported by Babushok et al., 2011.

<sup>2</sup> Identification of compound based on: RI (literature retention index), MS (library mass spectrum), PS (retention index and mass spectrum of pure standard compound).
